1  
2  
3  
4  
5  
6  
7  
8  
9  
10  
11  
12  
13  
14  
15  
16  
17  
18  
19  
20  
21  
22  
23  
24  
25  
26  
27  
28  
29

**TITLE:**

An emerging target paradigm evokes fast visuomotor responses on human upper limb muscles

**AUTHORS AND AFFILIATIONS:**

Rebecca A. Kozak<sup>1,4</sup>, Aaron L. Cecala<sup>2,4</sup>, Brian D. Corneil<sup>1,2,3,4</sup>

<sup>1</sup> Graduate Program in Neuroscience, Western University, London, On, Canada, N6A 5B7

<sup>2</sup> Department of Physiology and Pharmacology, Western University, London, Ontario, Canada, N6A 5B7

<sup>3</sup> Department of Psychology, Western University, London, Ontario, Canada, N6A 5B7

<sup>4</sup> Robarts Research Institute, 1151 Richmond St. N, London, Ontario, Canada, N6A 5B7

Corresponding Author:

Brian D. Corneil ([bcorneil@uwo.ca](mailto:bcorneil@uwo.ca))

Email address of co-authors:

Rebecca A. Kozak ([rkozak3@uwo.ca](mailto:rkozak3@uwo.ca))

Aaron L. Cecala ([acecala@uwo.ca](mailto:acecala@uwo.ca))

**KEYWORDS:**

Stimulus-locked responses (SLRs), Reaction time (RT), Visually-guided reaches, Humans, Electromyography

**SUMMARY:**

We present a new behavioural paradigm that elicits robust fast visuomotor responses on human upper limb muscles during visually guided reaches.

30 **ABSTRACT:**

31 To reach towards a seen object, visual information has to be transformed into motor  
32 commands. Visual information such as the object's colour, shape, and size is processed and  
33 integrated within numerous brain areas, then ultimately relayed to the motor periphery. In  
34 some instances we must react as fast as possible. These fast visuomotor transformations, and  
35 their underlying neurological substrates, are poorly understood in humans as they have lacked  
36 a reliable biomarker. Stimulus-locked responses (SLRs) are short latency (<100 ms) bursts of  
37 electromyographic (EMG) activity representing the first wave of muscle recruitment influenced  
38 by visual stimulus presentation. SLRs provide a quantifiable output of rapid visuomotor  
39 transformations, but SLRs have not been consistently observed in all subjects in past studies.  
40 Here we describe a new, behavioural paradigm featuring the sudden emergence of a moving  
41 target below an obstacle that consistently evokes robust SLRs. Human participants generated  
42 visually-guided reaches toward or away from the emerging target using a robotic  
43 manipulandum while surface electrodes recorded EMG activity from the pectoralis major  
44 muscle. In comparison to previous studies that investigated SLRs using static stimuli, the SLRs  
45 evoked with this emerging target paradigm were larger, evolved earlier, and were present in all  
46 participants. Reach reaction times (RTs) were also expedited in the emerging target paradigm.  
47 This paradigm affords numerous opportunities for modification that could permit systematic  
48 study of the impact of various sensory, cognitive, and motor manipulations on fast visuomotor  
49 responses. Overall, our results demonstrate that an emerging target paradigm is capable of  
50 consistently and robustly evoking activity within a fast visuomotor system.

51

52

53 **INTRODUCTION:**

54 When we notice a message on our cellphone, we are prompted to perform a visually-guided  
55 reach to pick up our phone and read the message. Visual features such as the shape and size of  
56 the phone are transformed into motor commands allowing us to successfully reach our goal.  
57 Such visuomotor transformations may be studied in laboratory conditions, which permit a high  
58 degree of control. However, there are scenarios where response time is of the essence; for  
59 example, catching our phone if it were to start to fall. Laboratory studies of fast visuomotor  
60 behaviors often rely on displaced target paradigms where on-going movements are modified in  
61 mid-flight following some change in target position (e.g.-(Soechting and Lacquaniti, 1983;  
62 Veerman et al., 2008)). While such online corrections can occur in <150 ms (Day and Lyon,  
63 2000), it is difficult to ascertain the exact timing of fast visuomotor output using kinematics  
64 alone due to the low-pass filtering characteristics of the arm, and because such output is  
65 superseding a movement already in mid-flight. Such complications lead to uncertainty about  
66 the substrates underlying fast visuomotor responses (e.g.- see review by(Gaveau et al., 2014)).  
67 Some studies suggest that subcortical structures such as the superior colliculus, rather than  
68 fronto-parietal cortical areas, may initiate online correction (Day and Brown, 2001).

69

70 This uncertainty regarding underlying neural substrates may be due, at least in part, to the lack  
71 of a reliable biomarker for the output of the fast visuomotor system. Recently, we have  
72 described a novel measure of fast visuomotor responses that may be generated from static  
73 postures and recorded via electromyography (EMG). Stimulus-locked responses (SLRs) are time

74 locked bursts of EMG activity that precede voluntary movement (Corneil et al., 2004; Pruszynski  
75 et al., 2010), evolving consistently ~100 ms after stimulus onset. As the name implies, SLRs are  
76 evoked by stimulus onset, persisting even if an eventual movement is withheld (Wood et al.,  
77 2015) or moves in the opposite direction (Gu et al., 2016). Furthermore, SLRs evoked by target  
78 displacement in a dynamic paradigm are associated with shorter latency online corrections, and  
79 manipulations of sensory input that influence SLR timing also influence the timing of on-line  
80 reach corrections (Kozak et al., 2019). Thus, SLRs provide an objective measure to  
81 systematically study the output of a fast visuomotor system, as they may be generated from a  
82 static posture and parsed from other EMG signals unrelated to the initial phase of the fast  
83 visuomotor response.

84  
85 All studies investigating the SLR have reported less than 100% detection rates across  
86 participants, even when using more invasive intramuscular recordings (Pruszynski et al., 2010;  
87 Wood et al., 2015; Gu et al., 2016). Low detection rates and a reliance on invasive recordings  
88 limit the usefulness SLR measures in future investigations into the fast visuomotor system in  
89 disease or across the lifespan. While it is possible that all subjects may simply not express the  
90 SLR, it may also be the case that the stimuli and behavioural paradigm were not ideal. Past  
91 reports of SLRs have used paradigms wherein participants generate visually-guided reaches  
92 towards static, suddenly appearing targets (Pruszynski et al., 2010; Gu et al., 2016). However, a  
93 fast visuomotor system is most likely needed in scenarios where we must rapidly interact with a  
94 falling or flying object, leading us to wonder if moving rather than static stimuli may better  
95 evoke SLRs. Here, we have adapted a moving target paradigm used to study eye movements  
96 (Kowler, 1989), and combined it with a pro/anti visually guided reaching task used to examine  
97 the SLR (Gu et al., 2016). We found the emerging target paradigm improved the magnitude and  
98 detectability of the SLR, in comparison to past studies relying on static stimuli. The emerging  
99 target paradigm also elicited shorter latency RTs. The purpose of this paper is to describe the  
100 emerging target paradigm, and present results on SLR magnitude, across-subject prevalence  
101 and RT in comparison to the static paradigm used previously. The emerging target paradigm can  
102 also be modified in many different ways, which should promote more thorough investigations  
103 into sensory, cognitive, or motor factors that promote or modify fast visuomotor responses.

104

105

## 106 **PROTOCOL:**

107

### 108 **1. Participant preparation**

109 1.1 After obtaining informed consent, participant preparation involves the application of EMGs  
110 to the upper limb muscles and setup in the apparatus. The pectoralis major muscle is involved  
111 in cross body reaching and provides a convenient location for electrode placement; therefore,  
112 the remainder of the methods will focus on this muscle. You may target the clavicular head, and  
113 if this location is not ideal then the sternal head, or the lateral portion of the pectoralis muscle  
114 close to the shoulder. Reasons for alternative electrode placement may include excessive hair  
115 or distribution of adipose, both of which may lower the signal to noise ratio of the EMG signal.  
116 To ensure consistency within this experiment, we required all participants to use their right arm  
117 for visually guided reaches regardless of handedness. Here we used a commercially available

118 system to record surface EMG activity (Delsys Inc. Bagnoli-8 system), however other recording  
119 equipment or electrodes may be used.

120 1.1.1 Visualize the muscles from which you will be recording. For pectoralis major, ask  
121 participants to relax elbows at sides and push palms together. This action will allow the  
122 visualization of target muscle(s), as this action is similar to the one used to grasp and  
123 manipulate the manipulandum.

124 1.1.2 Using alcohol swabs, clean the skin surface overlying the sternal and/or clavicular  
125 heads of the pectoralis major of the reaching arm and skin overlying the contralateral  
126 clavical; the latter will be the location of the ground electrode.

127 1.1.3 Apply double sided adhesive to Delsys surface sensors then apply small amount of  
128 electrode gel to each of the parallel EMG sensors.

129 1.1.4 Ask participant to place palms together again and adhere sensors perpendicular to  
130 the long axis of the visualized target muscle. Place ground electrode on left clavicle.

131 Secure sensors and ground electrodes to surrounding skin with medical tape and insert  
132 sensor wires into Delsys amplifier.

133 1.1.5 We used a desktop computer connected to the Delsys system to provide real-time  
134 monitoring of EMG activity throughout the experiment, and to help determine the  
135 suitability of electrode placement. To determine a suitable placement, ask participant to  
136 fully extend their right arm. During cross-body, leftward reaches, the peak EMG activity  
137 should be at least 2 times the level of baseline activity (if not considerably higher),  
138 whereas EMG activity should decrease from baseline during movements in the opposite  
139 (right) direction. Reposition the electrodes if necessary to ensure that these activity  
140 levels are observed.

141 1.2 We have set up participants in a bilateral endpoint robot (Kinarm, Kingston, Ontario,  
142 Canada). Only the right manipulandum was used. SLRs have been reported in the context of  
143 upper limb movements made in other platforms. The Kinarm endpoint robot allows reaching  
144 movements in a horizontal plane, and the application of force to the manipulandum. Adding  
145 force increases the background activity of the muscle of interest, allowing for expression of the  
146 SLR as an increase or decrease in muscle activity following stimulus presentation in the muscle's  
147 preferred or non-preferred direction, respectively. A level of baseline activity is especially useful  
148 in the non-preferred direction, as baseline and non-preferred reaching activity in the pectoralis  
149 muscle would be indistinguishable without a background loading force. We have applied 5N of  
150 force to the right and 2N of force down (opposite to a leftward presented target relative to the  
151 start position), throughout the entirety of the experiment.

152 1.2.1 Seat the participant in the experimental chair. Move and adjust the chair close  
153 enough to the screen and robot so the participant is comfortable. With a constant force  
154 applied to the arm for the duration of the experiment, the priority is to ensure the  
155 participant is comfortable, as repeated changes in body posture may change  
156 background muscle recruitment, while also ensuring that the recorded muscle is  
157 recruited during the reaching task.

158

## 159 **2. Stimuli construction/ apparatus**

160 2.1 All experimental procedures used the KINARM endpoint robot system. All stimuli were  
161 generated via the Kinarm apparatus using Matlab® (version R2016a, The MathWorks, Inc.,

162 Natick, Massachusetts, United States) Stateflow® and Simulink® applications. In our setup,  
163 stimuli were presented via a VPIXX projector (Saint-Bruno, QC, Canada) custom integrated into  
164 the Kinarm platform to ensure high quality visual images and event timing.

165 2.1.1 The emerging target paradigm contains 4 primary components, all of which are  
166 referenced here in relation to the midpoint of the two robot manipulandum origins in  
167 the Kinarm endpoint robot (reported in cm). An **inverted y path** (y: -19 (top of inverted  
168 y) or -34 (bottom of inverted y), x: -/+2 (inner, bottom inverted y), -/+8 (outer bottom  
169 inverted y); width .5 height: 20 (top) or 15 (bottom)), an **occluder** (centered at: 0, -29;  
170 width: 35 height: 15), a **moving target** which moves down the inverted y and behind the  
171 occluder (start: 0, -17; radius: 1; speed: 10 cm/s, speed behind occluder: 30 cm/s), and  
172 **start position** (0, -42; radius 1) (See Supplementary material for screen shot).

173 2.1.2 The occluder contains a notch cut out on the center bottom between the two  
174 outputs (0, -29; width: 5 height: 5). The participant is instructed to: “fixate the notch  
175 while a target is behind the occluder”. Doing so ensures the eye is stable at target  
176 emergence.

### 177 178 **3. Procedure**

179 3.1 Throughout a trial, the distal portions of the “inverted Y” path, the occluder box, and a  
180 white cursor representing the participant’s hand position were present (See Supplementary  
181 material for screen shot). The participant’s hand/arm was occluded during the experiment via  
182 an upward facing mirror reflecting downward-presented targets. Hand position was  
183 represented in the position as a real-time cursor (RTC) projected onto the screen. At the  
184 beginning of each trial, two stationary white dots are also presented to the participant. The dot  
185 above the occluder (T1) will become the eventual reach target. The other dot (T0) was located  
186 below the occluder, and represents the central start position.

187 3.1.1 For each trial, a participant brings the RTC into the central start position T0.  
188 Motion of T1 starts once the RTC remains aligned with T0 for a variable duration of 1-  
189 1.5 s. If the participant exits the T0 start position before the prescribed time, the trial  
190 will start again. The occluder will either be green, instructing the subject to generate a  
191 pro-reach toward the target when it emerges from below the occluder, or red,  
192 instructing the subject to generate an anti-reach away from the emerging target. T0  
193 disappeared once T1 begins moving, at which point no restrictions are placed on the  
194 subject’s arm motion.

195 3.1.2 After T1 reaches the occluder, it moves behind the occluder and travels at a  
196 constant speed of 30 cm/s along the y axis. Once T1 reaches half the length of the  
197 occluder, it bifurcates along one of the inverted y outputs with an additional x axis  
198 speed of 30cm/s. Thus, speed along the y axis is kept constant. The side T1 appears at  
199 the bottom of the inverted ‘y’ is randomized. The target vanishes for ~0.5 s, depending  
200 on the size of the occluder and the speed of T1 motion.

201 3.1.3 Once T1 reaches the edge of the occluder closest to the participant, instead of  
202 sliding past the edge of the occluder to create an initial ‘half-moon’ stimulus, T1 is  
203 invisible to the participant until the full target has moved below the occluder. This is  
204 done to control for visual processing effects of partial stimuli, especially if different  
205 speeds of targets are used which would cross the boundary at different times. A partial

206 emergence of a target (e.g.- half moon stimulus) produce a target composed initially of  
207 a higher spatial frequency, which based on our previous results would lead to increased  
208 SLR latency and decreased magnitude (Kozak et al., 2019).

209 3.1.4 Simultaneous with target appearance, a secondary target is presented in the  
210 corner of the screen, at a location covered by a photodiode. This target presented to the  
211 “corner” photodiode is not seen by the subject, but provides an analog signal that  
212 allows for the precise alignment of target appearance with muscle activity. This veridical  
213 signal is needed to account for any delay between the time that presentation software  
214 requests that the target emerges below the obstacle, and the time at which such  
215 emergence actually happens. Prior to data collection in any setup, we recommend using  
216 multiple photodiodes (one over the corner stimulus, others over where the targets  
217 emerge) to identify any lags in stimulus timing and ensure minimal trial-by-trial  
218 variability.

219 3.1.5 If the occluder is green, the participant is instructed to perform a pro-reach  
220 towards the emerging target, and intersect it, at which point the trial will end. If the  
221 occluder is red the participant must perform an anti-reach in the opposite direction of  
222 the target. The ‘inverted y’ path of T1 promotes leftward and rightward reaches in the  
223 pectoralis major muscles preferred and non-preferred direction, respectively.

224 3.1.6 Correct feedback is provided after the trial as either a ‘HIT’ (correct interception),  
225 ‘WRONGWAY’ (incorrect direction for pro/anti reach), or ‘MISS’ (neither correct nor  
226 incorrect responses detected). This feedback is written in the middle of the occluder in  
227 the inter-trial interval. In the anti-reach conditions, a correct interception (moving away  
228 from a target) is not based on the mirror image of T1, but rather the horizontal distance  
229 relative to T0. Distance is also used to determine a ‘MISS’ trial, where a target had  
230 moved a certain distance off of the screen and no correct or incorrect response was  
231 detected.

232 3.2 The procedure was split into 4 blocks of 100 trials each. Trial types were randomly  
233 intermixed. Each participant performed 100 reaches per unique condition (targets emerging left  
234 or right, pro- or anti-reach conditions; 4 trial types total). It is recommended that each  
235 condition consists of a minimum of ~80 reaches per condition when using surface recordings, as  
236 the next analysis step relies on data from many trials for SLR detection. Each block took  
237 approximately 7.5 minutes to complete.

238 3.3 For the purpose of comparison, we have also included a ‘static’ pro-reach and anti-reach  
239 paradigm, similar to paradigm reported in (Gu et al., 2016). Doing so allows us to compare the  
240 properties of SLRs recorded in the emerging target task to those recorded in a task used  
241 previously. Briefly, all recording methods are identical as listed above. The key difference lies in  
242 the nature of the behavioural paradigm, which involves only T0 (at the start position) and the  
243 presentation of a static target to the left or right. The start position (T0) is in the same position  
244 as in the emerging target paradigm (y: 0, x: -42, relative to the midpoint between the robotic  
245 manipulandum origins). The radius of T0 is larger ( $r=2$ ), and the colour of T0 changes to red or  
246 green to instruct the subject to generation a pro or anti reach in response to T1. T target (T1)  
247 appears 10 cm to the left or right of T0 after a randomized hold period (1-2s where the  
248 participants RTC must remain inside of T0; this period also serves as the instruction period  
249 based on the color of T0). As in the emerging target paradigm, a participant must reach towards



250 a target if T0 is green, and reach in the diametrically opposite direction away from a target if T0  
251 is red. As in Gu et al. 2016, the appearance of T1 was synchronous with the disappearance of  
252 T0.

253

#### 254 4. Analysis

255 4.1 Each block of data gathered from a participant has a downloadable .zip file containing  
256 kinematic data from each trial, as well as Delsys EMG surface recordings and photodiode output  
257 saved as analog inputs. These files are then unzipped and analyzed offline via custom Matlab  
258 scripts. Data was sampled at 1000 Hz. Error trials were not analyzed, as indicated by incorrect  
259 reach directions (3.5 cm in the wrong direction), long RTs (>500 ms) indicating presumed  
260 inattentiveness or short RTs (<120) indicating anticipation. The following details our method of  
261 analysis of SLRs and RTs, although alternative methods may also be suitable.

262 4.1.1 Reaction time was defined as 8% of the peak tangential velocity.

263 4.1.2 To analyze muscle activity offline, customized Matlab scripts convert the signals to  
264 source microvolts, and remove any DC offset, rectify the EMG signal, and filter the signal  
265 with a 7-point moving average filter.

266 4.1.3 A time-series receiver-operating characteristic (ROC) analysis is used to detect the  
267 presence and latency of the SLR (Corneil et al., 2004; Pruszynski et al., 2010), by defining  
268 the probability by which an ideal observer can discriminate through time the side of  
269 stimulus presentation based only on EMG activity. In our experiment, the ROC values  
270 were based on two distributions of EMG activity following leftward or rightward  
271 stimulus presentation (e.g.- Fig. 2c red versus light red traces). The ROC value (i.e., the  
272 area under the ROC curve) was calculated and plotted at every time sample (1ms) from  
273 100 ms before to 300 ms after target presentation (Fig. 1b or 2c). A ROC value of .5  
274 indicates chance discrimination, whereas values of 1 or 0 indicate perfectly correct or  
275 incorrect discrimination relative to target presentation, respectively. Discrimination  
276 thresholds was set to 0.6, and the discrimination latency was determined as the first of  
277 8 of 10 consecutive points that exceeded this value (Fig. 2c indicated by vertical red or  
278 blue lines). These parameters (threshold, and number of points exceeding threshold)  
279 may change depending on the quality and quantity of surface or intramuscular EMG  
280 recordings, and a bootstrapping analysis may be used to objectively determine  
281 confidence intervals. Past work of ours has shown that a value of 0.6 equates  
282 approximately to a 95% confidence interval (Goonetilleke et al., 2015).

283 4.1.3.1 We then determined the **presence** of an SLR on pro-reach trials using a  
284 RT-split analysis (see Fig.1, (Wood et al., 2015)). Briefly, this analysis determines  
285 whether EMG activity is more locked to stimulus onset rather than movement  
286 onset by using two separate time-series ROC analyses. First, trials from left and  
287 right directions are sorted and divided in 'early' and 'late' RT groups (Fig. 1a). A  
288 time-series ROC analysis is performed separately on early and late groups (Fig.  
289 1b), which yields separate EMG discrimination times for both groups. The ROC  
290 discrimination times are then plotted against the mean RTs for their respective  
291 early and late groups. This plot yields two points (early discrimination/RT versus  
292 late discrimination/RT) that are connected via a line (Fig. 1c). For this line, a  
293 slope of 90 deg would indicate that EMG discrimination times are locked to

294 stimulus presentation, whereas a slope of 45 deg would indicate that EMG  
295 discrimination are locked to movement onset. In practice, we used a cut-off  
296 slope of 67.5 degrees (halfway between 45 and 90 deg) to detect whether an SLR  
297 was present (slope > 67.5 deg) or not (slope < 67.5 deg).  
298 4.1.3.2 If SLR presence is determined, the **SLR latency** is defined by the  
299 discrimination latency from all the trials (4.1.3). After finding the discrimination  
300 latency, the same opposing left and right reaches were used to determine the  
301 **SLR magnitude** of the response. Left and right mean EMG traces were overlaid  
302 on the same plot (Fig. 2c dark red versus light red traces). Magnitude is  
303 calculated as the difference between left and right mean EMG traces from SLR  
304 latency to 30 ms post discrimination latency.

305  
306  
307

### 308 REPRESENTATIVE RESULTS:

309  
310  
311  
312

FIGURE 1

FIGURE 2

313  
314

### 313 FIGURES AND TABLES:

315  
316  
317  
318

FIGURE 3

FIGURE 4

319  
320

### 319 FIGURE AND TABLE LEGENDS:

321  
322  
323  
324  
325  
326  
327  
328  
329  
330  
331  
332  
333  
334  
335

FIGURE 1. Example of an SLR from a representative participant, illustrating our detection criteria. a) Trial-by-trial recruitment for right pectoralis major muscle for right or left reaches in the pro-reach condition. Each row is a different trial. Intensity of colour conveys the magnitude of EMG activity. Trials are sorted by reach RT (white boxes) and aligned to stimulus onset (black line). The SLR appears as a vertical banding of activity highlighted by grey boxes; note how EMG activity increases or decreases time-locked ~90 ms after leftward or rightward stimulus presentation, respectively. Purple or green bars indicate the trials contributing to the early or late RT groups, respectively. b) Time-series ROC analysis indicating time of EMG discrimination for early (purple) and late (green) trials shown in (a). c) For the early (purple) and late (green) group, mean RT is plotted as a function of ROC discrimination. The slope of the line connecting these two points is 83.7 degrees, indicating that EMG activity is more aligned to stimulus presentation than movement onset. SLR detection requires that the slope of this line exceed 67.5 degrees (halfway between 45 and 90).

336 FIGURE 2. Representative results from participants 1 and 2, showing the variability in the  
337 presence or absence of SLRs in the static (1<sup>st</sup> and 3<sup>rd</sup> rows), and the consistency of SLR presence



338 in the emerging target paradigms (2<sup>nd</sup> and 4<sup>th</sup> rows). A) Trial-by-trial recruitment for right  
339 pectoralis major muscle for these participants (same format as Fig. 1a). Conditions exhibiting an  
340 SLR are outlined in purple (2<sup>nd</sup>, 3<sup>rd</sup> and 4<sup>th</sup> rows). B) Mean +/- SE of EMG activity for both pro  
341 (red) and anti (blue) reaches, segregated by side of stimulus presentation (fainter traces used  
342 for movements in the non-preferred direction). Note how EMG activity in the SLR interval often  
343 initially increases after leftward stimulus presentation, even on anti-reach trials where the  
344 reaches proceed to the right (light blue traces). C) Time-series ROC analysis for pro (red) and  
345 anti (blue) reaches shown in (b). SLR epoch highlighted in grey box; horizontal dashed lines at  
346 0.4 and 0.6. Vertical coloured lines (if present in pro condition) show the discrimination time for  
347 pro- (red) or anti- (blue) reach trials.

348  
349  
350 FIGURE 3. Effects of an emerging target paradigm on SLR characteristics and reach RT. A) SLR  
351 latency (purple) and magnitude (green) for pro reaches in static versus emerging target  
352 paradigms. Latency defined as first 8 out of 10 continuous data points surpassing ROC threshold  
353 of .6 (see methods). Magnitude of SLR is defined as the integrated area over 30 ms after SLR  
354 discrimination between the mean EMG activity on left versus right trials. All magnitudes were  
355 normalized to the maximum for the participant across conditions (e.g.- a value of 1 indicates  
356 the maximal response). B) SLR prevalence and reach RT. SLR prevalence determined with RT  
357 split analysis (see methods and Fig. 1). RT determined at 8% of the peak tangential velocity. C)  
358 SLR magnitude and latency results from pro and anti-reaches in the emerging target paradigm.  
359 A) and B) demonstrates how fast visuomotor responses, be they SLRs or reach RTs, and  
360 expedited in the emerging target versus static paradigm. C) shows how a cognitive  
361 manipulation to prepare for a pro- or anti-reach influences SLR magnitude but not timing. \*  
362 denotes significance at  $p < .05$  compared to static or anti condition based on unpaired t-test.

363  
364 FIGURE 4. Summary of participant data. Same format as Fig. 2b and 2c, showing data across all  
365 five participants.

366

367

368 **TABLE OF MATERIALS:**

| <b>Name of Material/ Equipment</b> | <b>Company</b> | <b>Catalog Number</b> | <b>Comments/Description</b>                |
|------------------------------------|----------------|-----------------------|--------------------------------------------|
| <b>Kinarm End-Point Robot</b>      | Kinarm         |                       | Other reaching apparatus may be used       |
| <b>Bagnoli Desktop System</b>      | Delsys         |                       | Other EMG recording equipment may be used. |

369

370

371 **SUPPLEMENTARY FILES:**

372 Supplementary Fig. 1

373

374 **DISCUSSION:**

375

376 Humans have a remarkably capacity, when needed, to generate rapid, visually-guided actions at  
377 latencies that approach minimal afferent and efferent conduction delays. Systematic study of  
378 the neural mechanisms underlying rapid, visually-guided reaches is complicated by the arm's  
379 inertia and the fact that responses such as rapid on-line corrections supersede a movement  
380 already in mid-flight. We have previously described stimulus-locked responses (SLRs) on the  
381 upper limb as a new measure for rapid visuomotor responses (Pruszynski et al., 2010; Gu et al.,  
382 2016; Kozak et al., 2019). While beneficial in providing a trial-by-trial benchmark for the first  
383 aspect of upper limb muscle recruitment influenced by the visual stimulus, limb SLRs have not  
384 been expressed in all subjects and often relied upon invasive intramuscular recordings. Here,  
385 we describe an 'emerging target paradigm', in which subjects reach from a stable posture in  
386 response to the emergence of a moving visual target from behind an occluder. The benefits of  
387 the emergent target paradigm are apparent within individual participants, as participants who  
388 does not express the SLR in a paradigm used previously express one in the emerging target  
389 paradigm (e.g., Fig. 2, participant 1- 1<sup>st</sup> row versus 2<sup>nd</sup> row). Furthermore, SLRs expressed in the  
390 emerging target paradigm are much larger than in other paradigms, sometimes attaining  
391 magnitudes that approach that obtained just before movement onset (Fig. 2, participant 2; Fig.  
392 4, participant 5). Thus, this paradigm has proven to be effective in increasing the magnitude  
393 (Fig. 3a), detectability of the SLR (Fig. 3b), and promoting shorter RTs by approximately 50 ms  
394 (Fig. 3b), compared to the use of static targets.

395

396 Which features of the emerging target paradigm lead to robust expression of fast visuomotor  
397 responses? We speculate that a critical aspect is the implied motion of the target behind the  
398 occluder (supplemental material Fig. 1). Implied motion produces strong signals in motion-  
399 related areas in the dorsal visual stream that are indistinguishable from those produced by  
400 visible moving targets (Krekelberg et al., 2005). Our implementation of the emerging target  
401 paradigm also incorporated a high degree of certainty of the time at which the target would re-  
402 appear. The disappearance and subsequent emergence of the target behind the barrier may be  
403 akin to a 'gap interval' between offset of a central fixation or hold stimulus and presentation of  
404 a peripheral target, which also expedites reach reaction times (Gribble et al., 2002) and  
405 promotes the expression of express saccades (Paré and Munoz, 1996), which are another type  
406 of fast visuomotor response. Finally, it is important that the target emerging from behind the  
407 barrier is presented in its entirety, rather than being presented as sliding from behind the  
408 barrier. Were the target to slide past the barrier, the earliest stimulus available to the visual  
409 system would be a 'half-moon' stimulus that would lack the lower spatial frequencies known to  
410 promote earlier and stronger expression of limb SLRs (Kozak et al., 2019). In addition to these  
411 theoretical considerations, it is important to position the outlets for the emerging targets at  
412 locations associated with the preferred or non-preferred direction of the muscle(s) under study.  
413 Introducing a background loading force to increase activity of the muscle of interest is also  
414 beneficial in the detection of limb SLRs, as recruitment would increase or decrease for  
415 presentation of the target in the preferred or non-preferred direction, respectively. Finally,  
416 given the short latency of the limb SLR, it is imperative to ensure that the time of target  
417 emergence is known on every trial; depending on make and model, digital screens or projectors

418 can introduce quite variable delays in stimulus presentation which could compromise accurate  
419 alignment of muscle activity to critical events.

420  
421 There are a number of ways in which the emerging target paradigm could be modified, and  
422 doing so can further the understanding of the sensory, cognitive, and movement-related factors  
423 that influence the fast visuomotor system. Here, we instructed the subjects to prepare to move  
424 toward (a pro-reach) or away (an anti-reach) from the emerging target. As expected from  
425 previous results (Gu et al., 2016), consolidation of this instruction enabled subjects to dampen  
426 SLR magnitude without changing SLR timing. This shows that the neural centres mediating the  
427 SLR can be pre-set by higher-order areas establishing task set, prior to target emergence. There  
428 are numerous other dimensions in which the task could be modified to manipulate cognitive  
429 factors, for example by altering the predictability of target appearance in either time (i.e.,  
430 making the timing of emergence less predictable) or space (i.e., biasing target emergence to  
431 one side or another, or providing endogenous cues to indicate the side of emergence).  
432 Manipulations of the sensory parameters of the emerging target (e.g., the speed, contrast, size,  
433 or colour of the emerging stimulus, or the presence of competing distractors) will also provide  
434 insights into underlying substrates. Presenting a static rather than moving target below the  
435 barrier would also help parse the effects of target motion versus temporal predictability on the  
436 robustness of the limb SLR. Finally, from a motor perspective, the framework of the emerging  
437 target paradigm can be extended to bilateral reaching movements, and establishing the  
438 presence of robust SLRs on upper limb muscles potentiates the investigation the distribution of  
439 such signals to other trunk or limb muscles.

440  
441 One of the challenges associated with this paradigm, perhaps paradoxically, is the degree to  
442 which reach RTs were shortened. Our SLR detection criteria resembled that used previously  
443 (Goonetilleke et al., 2015), as we ran separate time-series ROC analyses for the shorter- or  
444 longer-than median RT groups. Doing so requires some degree of variance in reach RTs, and in  
445 practice we have found that reach RTs are shorter and less variable in the emerging target  
446 paradigm compared to the static paradigm (279 +/- 58 ms (static); 207 +/- 34 ms (dynamic)).  
447 Indeed, RTs were sometimes shortened to such a degree that the movement-related volley of  
448 EMG activity often blended into the SLR interval. Consequently, the time-series ROC often rose  
449 directly from values near 0.5 to values near 1.0, without displaying the brief decrease after the  
450 SLR that was required for detection in ((Wood et al., 2015); see Fig 4, participant 1,2,4,5). We  
451 expect that the detection criteria for SLRs may continue to evolve and will likely have to be  
452 optimized to the specifics of the task at hand. Other task manipulations, perhaps by increasing  
453 the temporal uncertainty of target re-emergence or requiring that subjects wait to move for a  
454 short interval after target emergence (e.g., by waiting for the emerged target to change colour),  
455 may help increase the mean and variance of reach RTs and separate recruitment during the SLR  
456 interval from that associated with movement onset.

457  
458 In closing, and mindful of the challenges associated with shorter and more invariant reach RTs,  
459 the framework of the emerging target paradigm will advance the study of rapid visuomotor  
460 responses, by providing a means to obtain robust expression of upper limb SLRs. It is  
461 particularly noteworthy that all of the results reported here were obtained with surface

462 recordings, as this will enable study of SLRs in populations that may be less amenable to  
463 intramuscular recording, like the young, the elderly, or the infirm. We also expect that the  
464 emerging target paradigm could be extended into animal studies in non-human primates and  
465 combined with neurophysiological techniques. Together with future work in humans that can  
466 rapidly explore the numerous sensory, cognitive, and motor dimensions of the task, the  
467 emerging target paradigm should potentiate hypothesis-driven explorations of the fast  
468 visuomotor system.

469  
470

#### 471 **ACKNOWLEDGMENTS:**

472 This work is supported by a Discovery Grant to BDC from the Natural Sciences and Engineering  
473 Research Council of Canada (NSERC; RGPIN 311680) and an Operating Grant to BDC from the  
474 Canadian Institutes of Health Research (CIHR; MOP-93796). RAK was supported by an Ontario  
475 Graduate Scholarship, and ALC was supported by an NSERC CREATE grant. The experimental  
476 apparatus described in this manuscript was supported by the Canada Foundation for  
477 Innovation. Additional support came from the Canada First Research Excellence Fund  
478 (BrainsCAN).

479

480

#### 481 **DISCLOSURES:**

482 The authors have nothing to disclose

483

#### 484 **REFERENCES:**

- 485 Corneil BD, Olivier E, Munoz DP (2004) Visual responses on neck muscles reveal selective gating  
486 that prevents express saccades. *Neuron* 42:831–841.
- 487 Day BL, Brown P (2001) Evidence for subcortical involvement in the visual control of human  
488 reaching. *Brain* 124:1832–1840.
- 489 Day BL, Lyon IN (2000) Voluntary modification of automatic arm movements evoked by motion  
490 of a visual target. *Exp Brain Res* 130:159–168.
- 491 Gaveau V, Pisella L, Priot A-E, Fukui T, Rossetti Y, Pélisson D, Prablanc C (2014) Automatic online  
492 control of motor adjustments in reaching and grasping. *Neuropsychologia* 55:25–40.
- 493 Goonetilleke SC, Katz L, Wood DK, Gu C, Huk AC, Corneil BD (2015) Cross-species comparison of  
494 anticipatory and stimulus-driven neck muscle activity well before saccadic gaze shifts in  
495 humans and nonhuman primates. *J Neurophysiol* 114:902–913.
- 496 Gribble PL, Everling S, Ford K, Mattar A (2002) Hand-eye coordination for rapid pointing  
497 movements: Arm movement direction and distance are specified prior to saccade onset.  
498 *Exp Brain Res*.
- 499 Gu C, Wood DK, Gribble PL, Corneil BD (2016) A Trial-by-Trial Window into Sensorimotor  
500 Transformations in the Human Motor Periphery. *J Neurosci* 36:8273–8282.
- 501 Kowler E (1989) Cognitive expectations, not habits, control anticipatory smooth oculomotor  
502 pursuit. *Vision Res*.
- 503 Kozak RA, Kreyenmeier P, Gu C, Johnston K, Corneil BD (2019) Stimulus-locked responses on  
504 human upper limb muscles and corrective reaches are preferentially evoked by low spatial  
505 frequencies. *eNeuro*.

- 506 Paré M, Munoz DP (1996) Saccadic reaction time in the monkey: advanced preparation of  
507 oculomotor programs is primarily responsible for express saccade occurrence. *J*  
508 *Neurophysiol* 76:3666–3681.
- 509 Pruszynski AJ, King GL, Boisse L, Scott SH, Randall Flanagan J, Munoz DP (2010) Stimulus-locked  
510 responses on human arm muscles reveal a rapid neural pathway linking visual input to arm  
511 motor output. *Eur J Neurosci* 32:1049–1057.
- 512 Soechting JF, Lacquaniti F (1983) Modification of trajectory of a pointing movement in response  
513 to a change in target location. *J Neurophysiol* 49:548–564.
- 514 Veerman MM, Brenner E, Smeets JBJ (2008) The latency for correcting a movement depends on  
515 the visual attribute that defines the target. *Exp Brain Res* 187:219–228.
- 516 Wood DK, Gu C, Corneil BD, Gribble PL, Goodale MA (2015) Transient visual responses reset the  
517 phase of low-frequency oscillations in the skeletomotor periphery. *Eur J Neurosci* 42:1919–  
518 1932.
- 519  
520

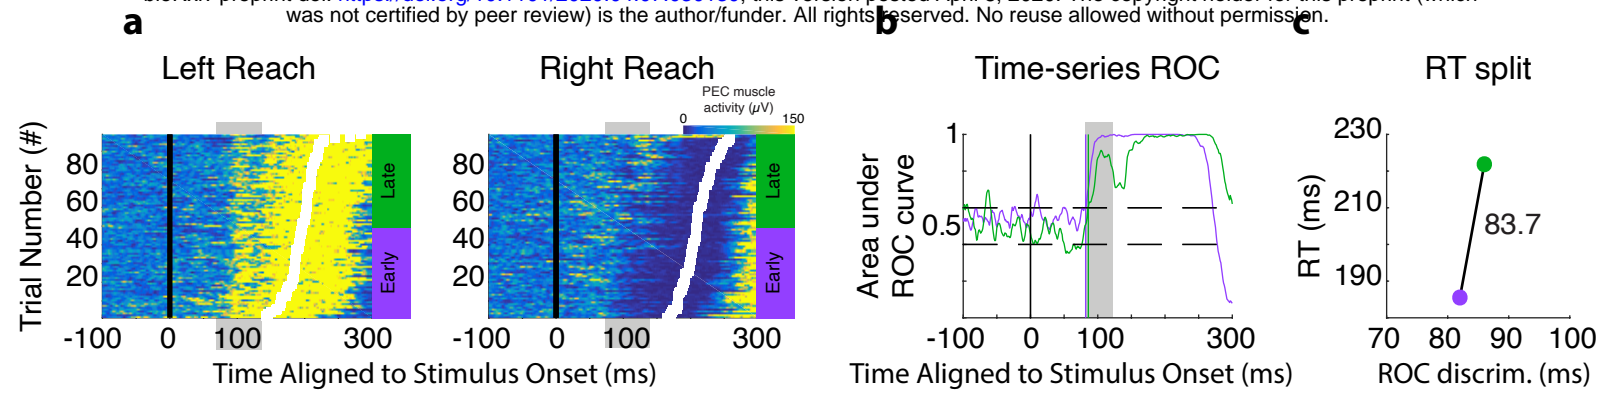



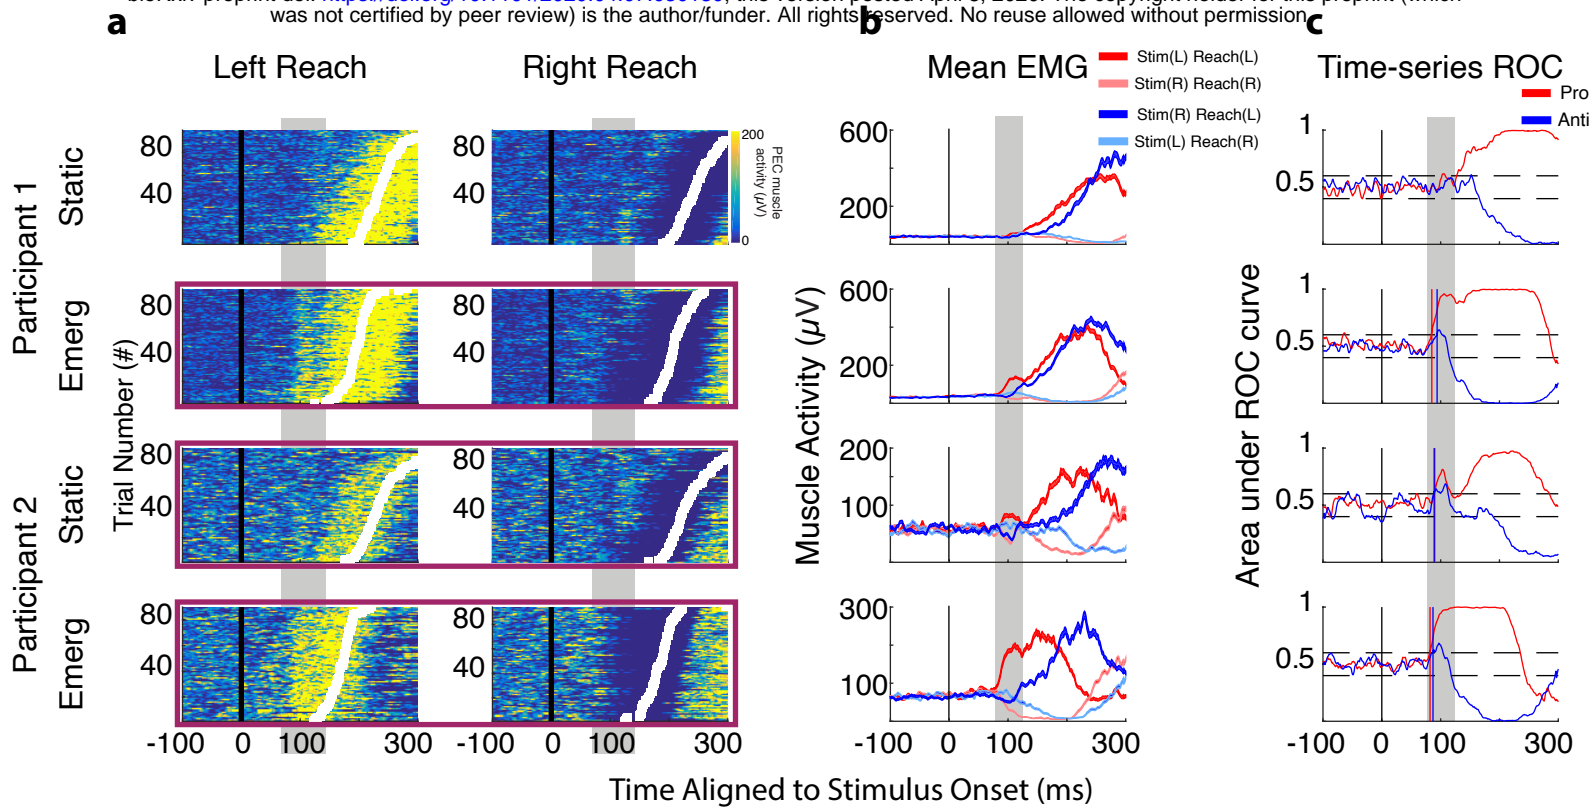

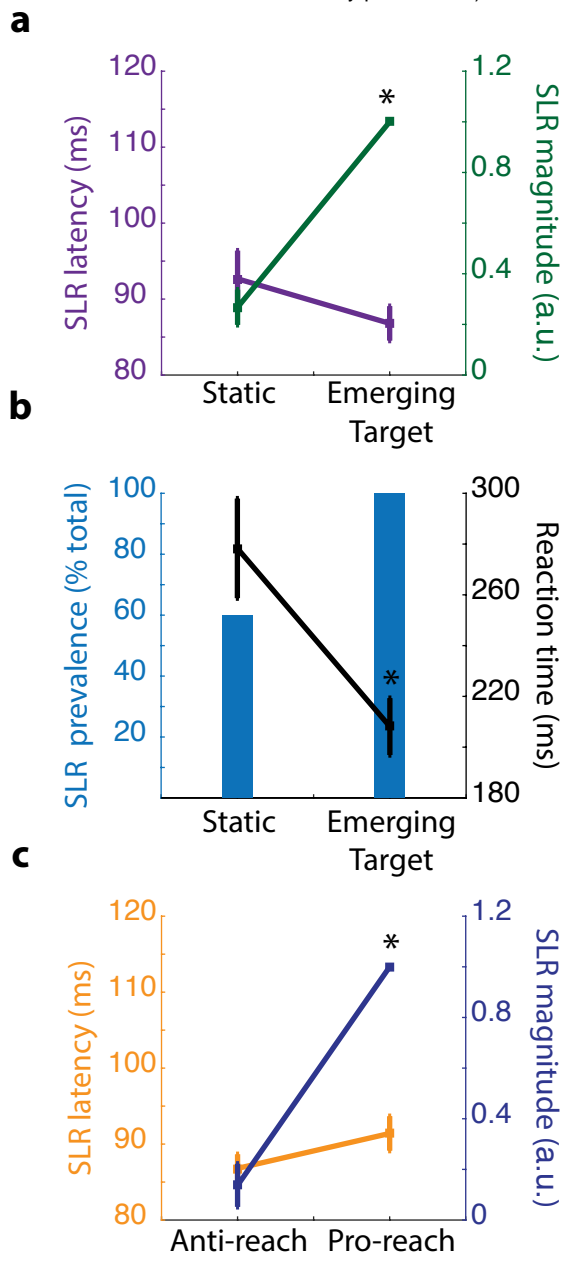

Figure 3-Kozak et al. 2020

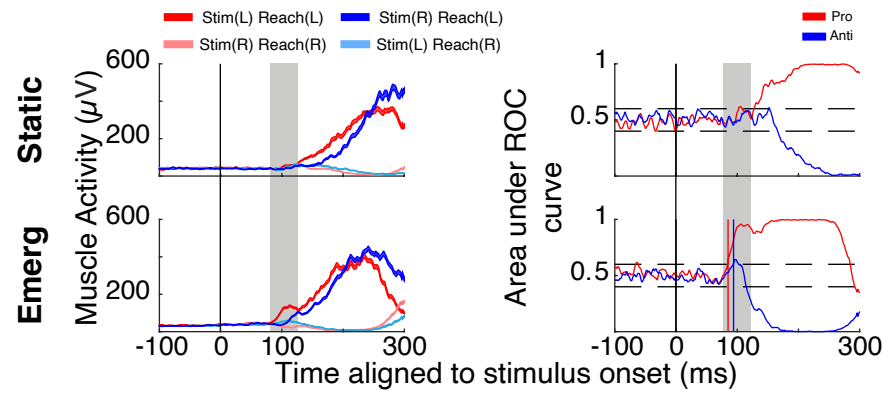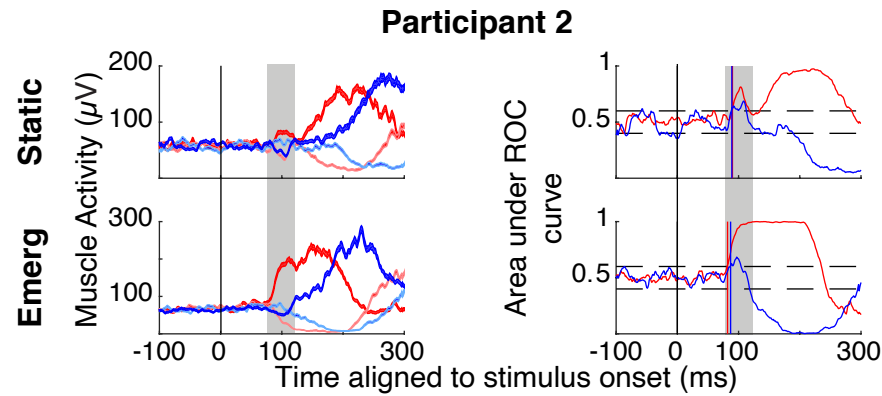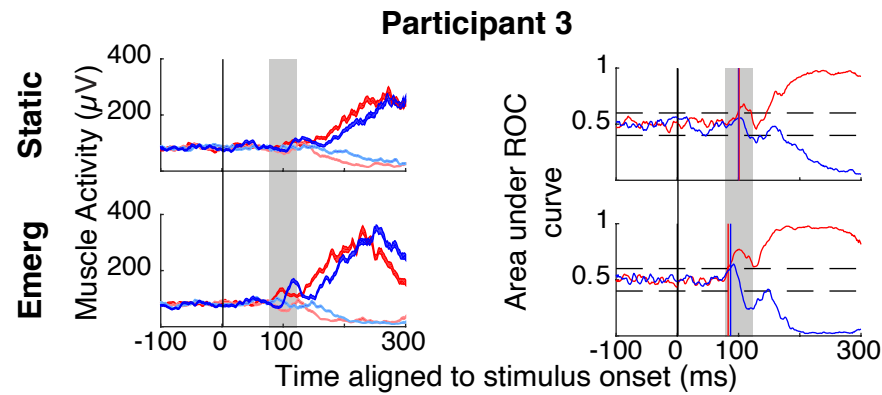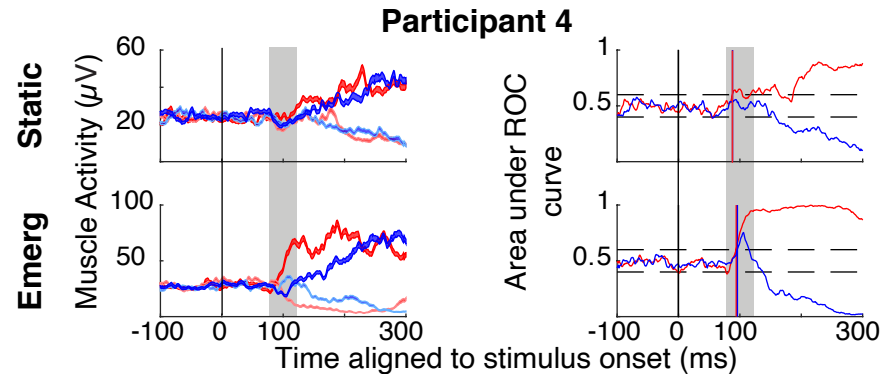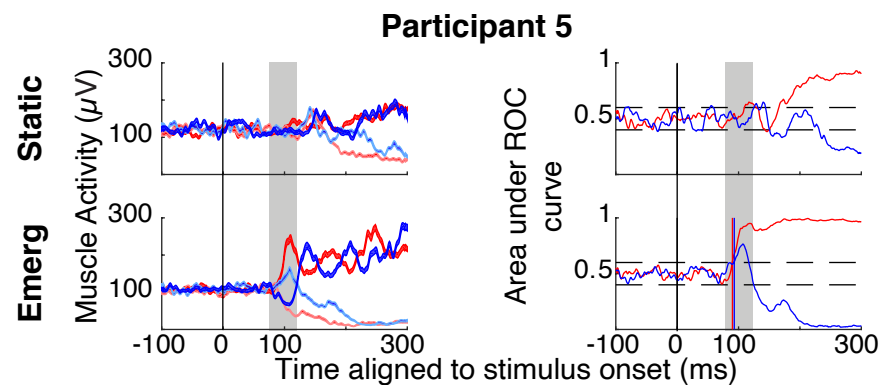

Figure 4-Kozak et al. 2020

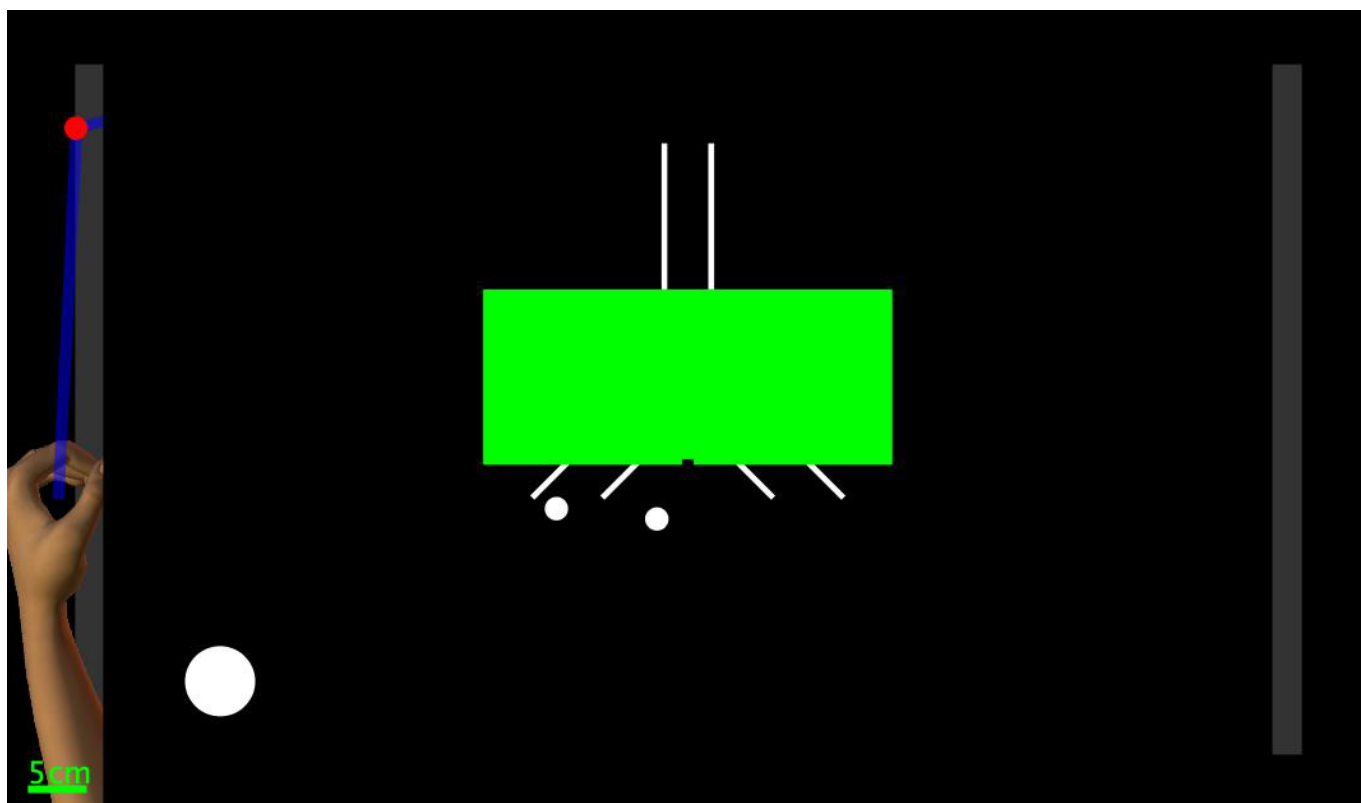

Source: https://www.biorxiv.org/content/biorxiv/early/2020/04/08/2020.04.07.030130.full.pdf
